# Supplementary material
Source: PubMed Central journal article supplement (PMC356983)
Supplement: pnas_0308707101_5.pdf [file pnas_0308707101_5.pdf]

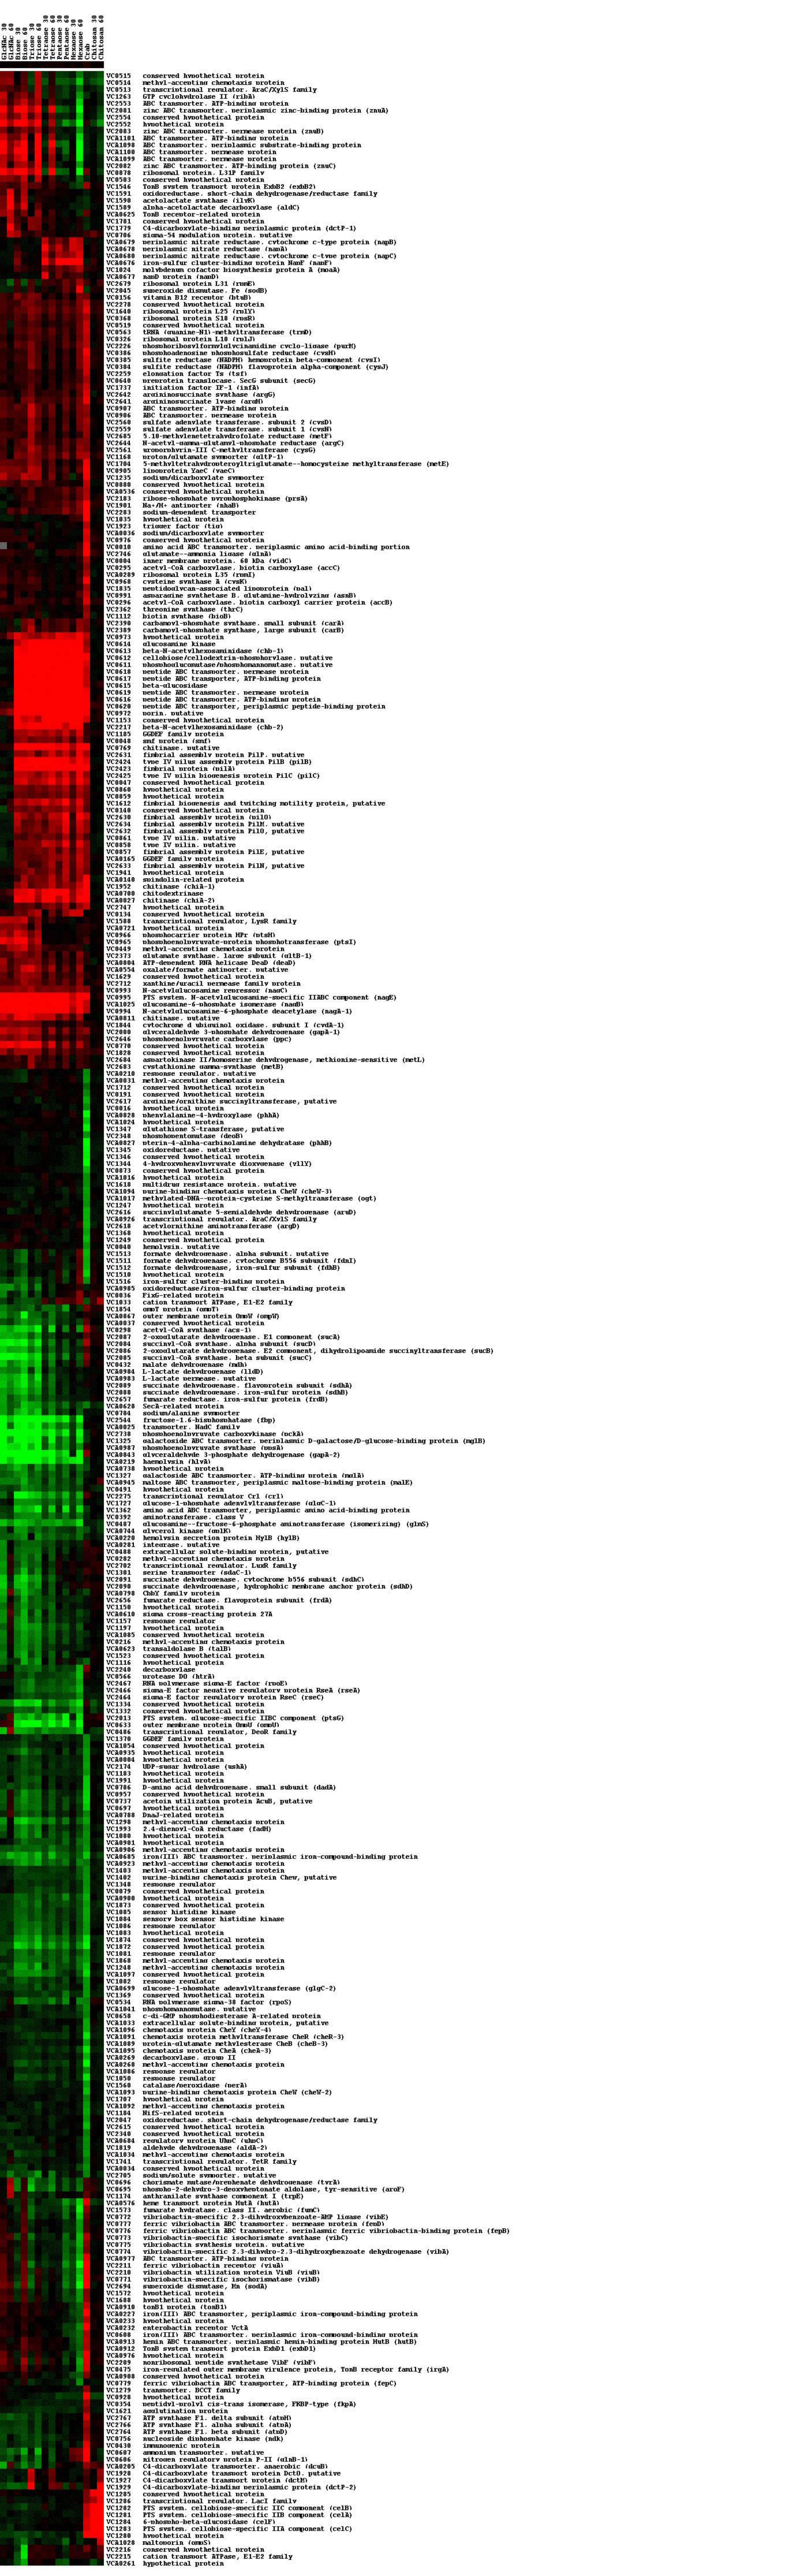

Glucose 30  
Galactose 60  
Starch 60  
Trehalose 60  
Triose 60  
Tetraose 60  
Pentose 60  
Hexose 60  
Crab  
Chitinase 30  
Chitinase 60

VC09515 conserved hvothetical protein  
VC09516 methyl-accenting chemotaxis protein  
VC09513 transcriptional regulator, AraC/XylS family  
VC1263 GTP cyclohydrolase II (ribA)  
VC2953 ABC transporter, ATP-binding protein  
VC0981 zinc ABC transporter, periplasmic zinc-binding protein (znuA)  
VC2954 conserved hvothetical protein  
VC2952 hvothetical protein  
VC2083 zinc ABC transporter, permease protein (znuB)  
VC09101 ABC transporter, ATP-binding protein  
VC09108 ABC transporter, periplasmic substrate-binding protein  
VC09100 ABC transporter, permease protein  
VC09109 ABC transporter, permease protein  
VC0982 zinc ABC transporter, ATP-binding protein (znuC)  
VC0978 ribosomal protein, L31P family  
VC09503 conserved hvothetical protein  
VC1546 TonB system transport protein ExhB2 (exhB2)  
VC1991 oxidoreductase, short-chain dehydrogenase/reductase family  
VC1990 acetolactate synthase (ilvK)  
VC1989 alpha-acetolactate decarboxylase (aldC)  
VC06625 TonB receptor-related protein  
VC1987 conserved hvothetical protein  
VC1779 C4-dicarboxylate-binding periplasmic protein (dctP-1)  
VC0706 sigma-54 modulation protein, putative  
VC06079 periplasmic nitrate reductase, cytochrome c-type protein (napB)  
VC06178 periplasmic nitrate reductase (napA)  
VC06080 periplasmic nitrate reductase, cytochrome c-type protein (napC)  
VC06076 iron-sulfur cluster-binding protein NanF (nanF)  
VC1024 molibdenum cofactor biosynthesis protein A (moaA)  
VC06077 nmf protein (nmfB)  
VC279 ribosomal protein L31 (rmlE)  
VC2045 superoxide dismutase, Fe (sodB)  
VC09156 vitamin B12 receptor (btuB)  
VC02278 conserved hvothetical protein  
VC1640 ribosomal protein L29 (rmlV)  
VC0368 ribosomal protein S18 (rpsR)  
VC09519 conserved hvothetical protein  
VC09563 tRNA (guanine-11)-methyltransferase (trmD)  
VC09396 ribosomal protein L10 (rmlI)  
VC2226 phosphoribosylformyl-L-glutaminidase cyclo-ligase (purK)  
VC09386 phosphoadenosine phosphosulfate reductase (cysH)  
VC09385 sulfite reductase (HMPDH) hemoprotein beta-component (cysI)  
VC09384 sulfite reductase (HMPDH) flavoprotein alpha-component (cysJ)  
VC2259 elongation factor Ts (tsf)  
VC06640 urenprotein translocase, SecE subunit (secE)  
VC1737 initiation factor IF-1 (infA)  
VC2642 argininosuccinate synthase (argG)  
VC2641 argininosuccinate lyase (argH)  
VC0907 ABC transporter, ATP-binding protein  
VC0906 sulfate adenylate transferase, subunit 2 (cysD)  
VC2959 sulfate adenylate transferase, subunit 1 (cysN)  
VC2685 5,10-methylenetetrahydrofolate reductase (metF)  
VC2644 N-acetyl-gamma-glutamyl-phosphatase reductase (argC)  
VC09561 uronolactamase III C-methyltransferase (cysE)  
VC1168 proton/glutamate symporter (glpT-1)  
VC1704 5-methyltetrahydropteroyltri-glutamate--homocysteine methyltransferase (metE)  
VC0905 liponprotein ZaeC (vaeC)  
VC1235 sodium/dicarboxylate symporter  
VC0880 conserved hvothetical protein  
VC08536 conserved hvothetical protein  
VC2183 ribose-phosphate pyrophosphokinase (prsA)  
VC1901 Na<sup>+</sup>/H<sup>+</sup> antiporter (nahB)  
VC2283 sodium-dependent transporter  
VC1035 hvothetical protein  
VC1923 trigger factor (tif)  
VC09036 sodium/dicarboxylate symporter  
VC0976 conserved hvothetical protein  
VC0010 amino acid ABC transporter, periplasmic amino acid-binding portion  
VC2746 glutamate--ammonia lyase (glmA)  
VC09004 inner membrane protein, 60 kDa (vrdC)  
VC0295 acetyl-CoA carboxylase, biotin carboxylase (accC)  
VC09289 ribosomal protein L35 (rmlL)  
VC09668 cysteine synthase A (cysK)  
VC1835 peptidyl-carboxyl-associated liponprotein (nal)  
VC0991 asparagine synthetase B, glutamine-hydrolyzing (asnB)  
VC0296 acetyl-CoA carboxylase, biotin carboxyl carrier protein (accB)  
VC2362 threonine synthase (thrC)  
VC1112 biotin synthase (bioB)  
VC2390 carbanoyl-phosphate synthase, small subunit (carA)  
VC2389 carbanoyl-phosphate synthase, large subunit (carB)  
VC0973 hvothetical protein  
VC0614 glucosamine kinase  
VC0613 beta-N-acetylhexosaminidase (chb-1)  
VC0612 cellobiose/cellobextrin-phosphorlyase, putative  
VC0611 phosphonucleotidase/phosphonucleotidase, putative  
VC0610 peptide ABC transporter, permease protein  
VC0617 peptide ABC transporter, ATP-binding protein  
VC0615 beta-glucosidase  
VC0619 peptide ABC transporter, permease protein  
VC0616 peptide ABC transporter, ATP-binding protein  
VC0620 peptide ABC transporter, periplasmic peptide-binding protein  
VC0972 norin, putative  
VC1153 conserved hvothetical protein  
VC2217 beta-N-acetylhexosaminidase (chb-2)  
VC1185 GDEF family protein  
VC0848 smf protein (smf)  
VC0769 chitinase, putative  
VC2631 fibrial assembly protein PilP, putative  
VC2424 type IV pilus assembly protein PilB (pilB)  
VC2423 fibrial protein (nilA)  
VC2425 type IV pilin biogenesis protein PilC (pilC)  
VC0847 conserved hvothetical protein  
VC0860 hvothetical protein  
VC0859 hvothetical protein  
VC1612 fibrial biogenesis and twitching motility protein, putative  
VC0840 conserved hvothetical protein  
VC2630 fibrial assembly protein (nilD)  
VC2634 fibrial assembly protein PilM, putative  
VC2632 fibrial assembly protein PilO, putative  
VC0861 type IV pilin, putative  
VC0858 type IV pilin, putative  
VC0857 fibrial assembly protein PilE, putative  
VC08165 GDEF family protein  
VC2633 fibrial assembly protein PilN, putative  
VC1941 hvothetical protein  
VC08140 smidolin-related protein  
VC1952 chitinase (chiA-1)  
VC0700 chitodextrinase  
VC00027 chitinase (chiA-2)  
VC2747 hvothetical protein  
VC09134 conserved hvothetical protein  
VC1508 transcriptional regulator, LysR family  
VC08221 hvothetical protein  
VC0966 phosphocarrier protein MPr (otsH)  
VC0965 phosphoenolpyruvate-protein phosphotransferase (ptsI)  
VC0449 methyl-accenting chemotaxis protein  
VC2374 glutamate synthase, large subunit (gluB-1)  
VC0804 ATP-dependent RNA helicase Dead (dead)  
VC0554 oxalate/formate antiporter, putative  
VC1629 conserved hvothetical protein  
VC2715 xanthine/uracil permease family protein  
VC0993 N-acetylglucosamine repressor (nanC)  
VC0995 PTS system, N-acetylglucosamine-specific IIBC component (nagE)  
VC08125 glucosamine-6-phosphatase isomerase (nanB)  
VC0994 N-acetylglucosamine-6-phosphate deacetylase (nagA-1)  
VC0811 chitinase, putative  
VC1844 cytochrome d ubiquinol oxidase, subunit I (cvdA-1)  
VC2000 glyceroldehyde 3-phosphate dehydrogenase (gapA-1)  
VC2645 phosphoenolpyruvate carboxylase (ppc)  
VC0770 conserved hvothetical protein  
VC1828 conserved hvothetical protein  
VC2684 aspartokinase II/homoserine dehydrogenase, methionine-sensitive (metL)  
VC2683 cystathionine gamma-synthase (metB)  
VC08210 response regulator, putative  
VC08031 methyl-accenting chemotaxis protein  
VC1712 conserved hvothetical protein  
VC09191 conserved hvothetical protein  
VC2617 arginine/ornithine succinyltransferase, putative  
VC08016 hvothetical protein  
VC08028 phenylalanine-4-hydroxylase (phhA)  
VC08024 hvothetical protein  
VC1347 glutathione S-transferase, putative  
VC2348 phosphonucleotidase (deoB)  
VC08027 neterin-4-alpha-carbinolamine dehydratase (phhB)  
VC1345 oxidoreductase, putative  
VC1346 conserved hvothetical protein  
VC1344 4-hydroxyphenylpyruvate dioxygenase (vllY)  
VC09873 conserved hvothetical protein  
VC0816 hvothetical protein  
VC1618 multidrug resistance protein, putative  
VC08094 uric acid-binding chemotaxis protein CheW (cheW-3)  
VC08107 methylated-DNA--protein-cysteine S-methyltransferase (ogt)  
VC1247 hvothetical protein  
VC2616 succinylglutamate 5-semialdehyde dehydrogenase (aruD)  
VC09226 transcriptional regulator, AraC/XylS family  
VC2618 acetylornithine aminotransferase (argP)  
VC1368 hvothetical protein  
VC1249 conserved hvothetical protein  
VC08040 hemolysin, putative  
VC1513 formate dehydrogenase, alpha subunit, putative  
VC1511 formate dehydrogenase, cytochrome B556 subunit (fdnI)  
VC1512 formate dehydrogenase, iron-sulfur subunit (fdnB)  
VC1510 hvothetical protein  
VC1516 iron-sulfur cluster-binding protein  
VC09895 oxidoreductase/iron-sulfur cluster-binding protein  
VC08036 pilZ-related protein  
VC1033 cation transport ATPase, E1-E2 family  
VC1854 ompT protein (ompT)  
VC08657 outer membrane protein OmpW (ompW)  
VC08037 conserved hvothetical protein  
VC0298 acetyl-CoA synthase (acs-1)  
VC2087 2-oxoglutarate dehydrogenase, E1 component (sucA)  
VC2084 succinyl-CoA synthase, alpha subunit (sucD)  
VC2086 2-oxoglutarate dehydrogenase, E2 component, dihydroliipoamide succinyltransferase (sucB)  
VC2085 succinyl-CoA synthase, beta subunit (sucC)  
VC0432 malate dehydrogenase (mdh)  
VC09094 L-lactate dehydrogenase (ldhB)  
VC09093 L-lactate permease, putative  
VC2089 succinate dehydrogenase, flavoprotein subunit (sdhA)  
VC2088 succinate dehydrogenase, iron-sulfur protein (sdhB)  
VC2657 fumarate reductase, iron-sulfur protein (frdB)  
VC06628 SecE-related protein  
VC0784 sodium/alanine symporter  
VC2544 fructose-1,6-bisphosphatase (fbp)  
VC08025 transporter, NaK family  
VC2738 phosphoenolpyruvate carboxylase (ackA)  
VC1325 galactoside ABC transporter, periplasmic D-galactose/D-glucose-binding protein (nglB)  
VC09097 phosphoenolpyruvate synthase (msaA)  
VC08043 glyceroldehyde 3-phosphate dehydrogenase (gapA-2)  
VC0919 haemolysin (hlyA)  
VC080738 hvothetical protein  
VC1327 galactoside ABC transporter, ATP-binding protein (nglA)  
VC09445 maltose ABC transporter, periplasmic maltose-binding protein (malE)  
VC0941 hvothetical protein  
VC2275 transcriptional regulator Crl (crl)  
VC1727 glucose-1-phosphate adenyltransferase (gluC-1)  
VC1362 amino acid ABC transporter, periplasmic amino acid-binding protein  
VC09392 aminotransferase, class V  
VC080744 glucosamine--fructose-6-phosphate aminotransferase (isomerizing) (glmS)  
VC080744 glycerol kinase (glmK)  
VC080220 hemolysin secretion protein HylB (hylB)  
VC09291 interase, putative  
VC0488 extracellular solute-binding protein, putative  
VC0282 methyl-accenting chemotaxis protein  
VC2702 transcriptional regulator, LuxR family  
VC1301 serine transporter (sdcA-1)  
VC091 succinate dehydrogenase, cytochrome b556 subunit (sdhC)  
VC2090 succinate dehydrogenase, hydrophobic membrane anchor protein (sdhD)  
VC09798 Ohy family protein  
VC2656 fumarate reductase, flavoprotein subunit (frdA)  
VC1150 hvothetical protein  
VC080610 sigma cross-reacting protein 27A  
VC1157 response regulator  
VC1197 hvothetical protein  
VC08085 conserved hvothetical protein  
VC0216 methyl-accenting chemotaxis protein  
VC08023 transaldolase B (talB)  
VC1196 conserved hvothetical protein  
VC1116 hvothetical protein  
VC2240 decarboxylase  
VC0966 protease D0 (htrA)  
VC2467 RNA polymerase sigma-E factor (rnfE)  
VC2466 sigma-E factor negative regulatory protein RseA (rseA)  
VC2464 sigma-E factor regulatory protein RseC (rseC)  
VC1334 conserved hvothetical protein  
VC1332 conserved hvothetical protein  
VC0913 PTS system, glucose-specific IIBC component (ptsG)  
VC0633 outer membrane protein OmpU (ompU)  
VC0486 transcriptional regulator, DeoR family  
VC1370 GDEF family protein  
VC081054 conserved hvothetical protein  
VC0935 hvothetical protein  
VC08004 hvothetical protein  
VC2174 UDP-sugar hydrolase (ushA)  
VC1183 hvothetical protein  
VC1991 hvothetical protein  
VC0786 D-amino acid dehydrogenase, small subunit (dadA)  
VC0997 conserved hvothetical protein  
VC0737 acetoin utilization protein AcuB, putative  
VC0697 hvothetical protein  
VC080788 DnaJ-related protein  
VC1296 methyl-accenting chemotaxis protein  
VC1993 2,4-dienoyl-CoA reductase (fadH)  
VC1080 hvothetical protein  
VC09091 hvothetical protein  
VC09096 methyl-accenting chemotaxis protein  
VC08095 iron(III) ABC transporter, periplasmic iron-compound-binding protein  
VC08093 methyl-accenting chemotaxis protein  
VC1403 methyl-accenting chemotaxis protein  
VC1402 uric acid-binding chemotaxis protein Chew, putative  
VC1344 response regulator  
VC08079 conserved hvothetical protein  
VC09000 hvothetical protein  
VC1873 conserved hvothetical protein  
VC1085 sensor histidine kinase  
VC1084 sensor box sensor histidine kinase  
VC1086 response regulator  
VC1083 hvothetical protein  
VC1874 conserved hvothetical protein  
VC1872 conserved hvothetical protein  
VC1081 response regulator  
VC1368 methyl-accenting chemotaxis protein  
VC1248 methyl-accenting chemotaxis protein  
VC1097 conserved hvothetical protein  
VC1082 response regulator  
VC08099 glucose-1-phosphate adenyltransferase (glgC-2)  
VC1362 conserved hvothetical protein  
VC0934 RNA polymerase sigma-38 factor (rpoS)  
VC08104 C-di-GMP phosphodiesterase A-related protein  
VC08103 extracellular solute-binding protein, putative  
VC08106 chemotaxis protein CheY (cheY-4)  
VC08109 chemotaxis protein methyltransferase CheR (cheR-3)  
VC08108 protein-glutamate methyltransferase CheB (cheB-3)  
VC08105 chemotaxis protein CheZ (cheZ-3)  
VC080269 decarboxylase, group II  
VC080268 methyl-accenting chemotaxis protein  
VC1806 response regulator  
VC1950 response regulator  
VC1560 catalase/peroxidase (perA)  
VC081093 uric acid-binding chemotaxis protein CheW (cheW-2)  
VC1707 hvothetical protein  
VC18092 methyl-accenting chemotaxis protein  
VC1184 NifS-related protein  
VC2047 oxidoreductase, short-chain dehydrogenase/reductase family  
VC2615 conserved hvothetical protein  
VC2340 conserved hvothetical protein  
VC08084 regulatory protein UhmC (uhmC)  
VC1819 aldehyde dehydrogenase (aldA-2)  
VC081034 methyl-accenting chemotaxis protein  
VC1741 transcriptional regulator, TetR family  
VC08034 conserved hvothetical protein  
VC2705 sodium/solute symporter, putative  
VC08096 chorismate mutase/prephenate dehydrogenase (trpA)  
VC08095 phospho-2-dehydro-3-oxoheptanoate aldolase, tyr-sensitive (aroF)  
VC1174 anthranilate synthase component I (trpE)  
VC080576 heme transport protein HupA (hupA)  
VC1573 fumarate hydratase, class II, aerobic (fumC)  
VC081034 vibriobactin-specific 2,3-dihydroxybenzoate-AMP lyase (fndE)  
VC0777 ferric vibriobactin ABC transporter, permease protein (fepB)  
VC0776 ferric vibriobactin ABC transporter, periplasmic ferric vibriobactin-binding protein (fepB)  
VC0773 vibriobactin-specific isochorismate synthase (vibC)  
VC0775 vibriobactin synthase protein, putative  
VC08074 vibriobactin-specific 2,3-dihydro-2,3-dihydroxybenzoate dehydrogenase (vibA)  
VC08077 ABC transporter, ATP-binding protein  
VC2211 ferric vibriobactin ABC transporter (vibA)  
VC2210 vibriobactin utilization protein VibB  
VC080771 vibriobactin-specific isochorismatase (vibB)  
VC2694 superoxide dismutase, Mn (sodA)  
VC1572 hvothetical protein  
VC1608 hvothetical protein  
VC08010 tonB1 protein (tonB1)  
VC080227 iron(III) ABC transporter, periplasmic iron-compound-binding protein  
VC08023 hvothetical protein  
VC08022 enterobactin receptor VcaA  
VC0608 iron(III) ABC transporter, periplasmic iron-compound-binding protein  
VC0913 hemin ABC transporter, periplasmic hemin-binding protein HutB (hutB)  
VC09092 TonB system transport protein ExhB1 (exhB1)  
VC09096 hvothetical protein  
VC2209 nonribosomal peptide synthetase VibF (vibF)  
VC08475 iron-regulated outer membrane virulence protein, TonB receptor family (irgA)  
VC09098 conserved hvothetical protein  
VC08177 ferric vibriobactin ABC transporter, ATP-binding protein (fepC)  
VC1279 transporter, BCCT family  
VC0928 hvothetical protein  
VC09354 neptidyl-prolyl cis-trans isomerase, FKBP-type (fkpA)  
VC1621 amidination protein  
VC2765 ATP synthase F1, delta subunit (atnH)  
VC2766 ATP synthase F1, alpha subunit (atnA)  
VC2764 ATP synthase F1, beta subunit (atnB)  
VC08076 nucleosial diphosphate kinase (ndk)  
VC0840 immunogenic protein  
VC0607 ammonium transporter, putative  
VC09066 nitrogen regulatory protein P-II (ntrB-1)  
VC08095 C4-dicarboxylate transporter, anaerobic (dcaB)  
VC1929 C4-dicarboxylate transport protein DctD, putative  
VC1927 C4-dicarboxylate-binding periplasmic protein (dctP-2)  
VC1929 conserved hvothetical protein  
VC1283 transcriptional regulator, LacI family  
VC1282 PTS system, cellobiose-specific IIC component (celI)  
VC1281 PTS system, cellobiose-specific IIB component (celA)  
VC1284 C6-homo-beta-glucosidase (celF)  
VC1283 PTS system, cellobiose-specific IIA component (celC)  
VC1280 hvothetical protein  
VC081028 maltosin (ompS)  
VC2216 conserved hvothetical protein  
VC2215 cation transport ATPase, E1-E2 family  
VC08261 hvothetical protein
