# Supplementary material
Source: PubMed Central journal article supplement (PMC356983)
Supplement: pnas_0308707101_7.pdf [file pnas_0308707101_7.pdf]

GlcNAc  
 (GlcNAc)<sup>2</sup>  
 (GlcNAc)<sup>3</sup>  
 (GlcNAc)<sup>4</sup>  
 (GlcNAc)<sup>5</sup>  
 (GlcNAc)<sup>6</sup>  
 crab  
 (GlcN)<sup>2</sup>

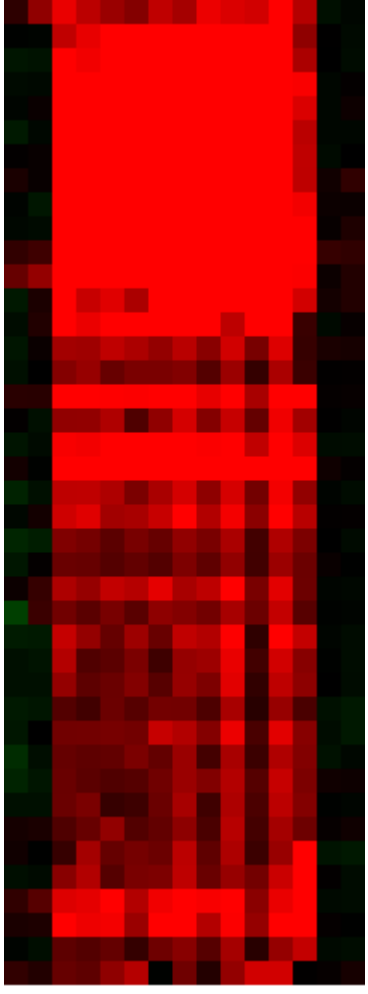

- VC0973 hypothetical protein
- VC0614 glucosamine kinase
- VC0613 beta-N-acetylhexosaminidase (chb-1)
- VC0612 cellobiose/cellobextrin-phosphorylase
- VC0611 phosphoglucomutase/phosphomannomutase
- VC0618 peptide ABC transporter, permease protein
- VC0617 peptide ABC transporter, ATP-binding protein
- VC0615 cellobiase
- VC0619 peptide ABC transporter, permease protein
- VC0616 peptide ABC transporter, ATP-binding protein
- VC0620 peptide ABC transporter, periplasmic peptide-binding protein
- VC0972 porin
- VC1153 conserved hypothetical protein
- VC2217 beta-N-acetyl-hexosaminidase (chb-2)
- VC1185 GGDEF family protein
- VC0048 smf protein (smf)
- VC0769 chitinase
- VC2631 fimbrial assembly protein PilP
- VC2424 type IV pilin biogenesis protein PilB (pilB)
- VC2423 fimbrial protein (pilA)
- VC2425 type IV pilin biogenesis protein PilC (pilC)
- VC0047 conserved hypothetical protein
- VC0860 hypothetical protein
- VC0859 hypothetical protein
- VC1612 fimbrial biogenesis and twitching motility protein
- VC0140 conserved hypothetical protein
- VC2630 fimbrial assembly protein PilQ
- VC2634 fimbrial assembly protein PilM
- VC2632 fimbrial assembly protein PilO
- VC0861 type IV pilin
- VC0858 type IV pilin
- VC0857 fimbrial assembly protein PilE
- VCA0165 GGDEF family protein
- VC2633 fimbrial assembly protein PilN
- VC1941 hypothetical protein
- VCA0140 spindolin-related protein
- VC1952 chitinase (chiA-1)
- VCA0700 chitodextrinase
- VCA0027 chitinase (chiA-2)
- VC2747 hypothetical protein
- VC0134 conserved hypothetical protein
