# Supplementary material
Source: PubMed Central journal article supplement (PMC356983)
Supplement: pnas_0308707101_9.pdf [file pnas_0308707101_9.pdf]

GlcNAc  
 (GlcNAc)<sub>2</sub>  
 (GlcNAc)<sub>3</sub>  
 (GlcNAc)<sub>4</sub>  
 (GlcNAc)<sub>5</sub>  
 (GlcNAc)<sub>6</sub>  
 crab  
 (GlcN)<sub>2</sub>

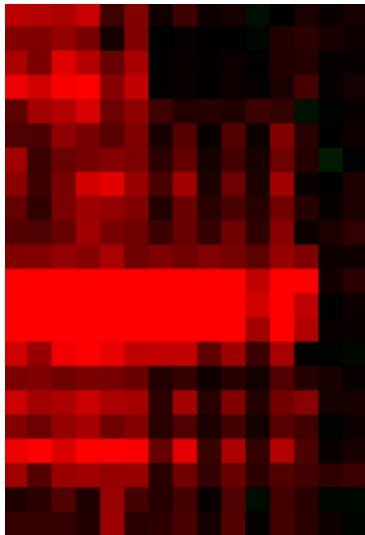

VC1588 transcriptional regulator, LysR family  
 VCA0721 hypothetical protein  
 VC0966 phosphocarrier protein HPr (ptsH)  
 VC0965 phosphoenolpyruvate-protein phosphotransferase (ptsI)  
 VC0449 methyl-accepting chemotaxis protein  
 VC2373 glutamate synthase, large subunit (gltB-1)  
 VCA0804 ATP-dependent RNA helicase DeaD (deaD)  
 VCA0554 oxalate/formate antiporter  
 VC1629 conserved hypothetical protein  
 VC2712 xanthine/uracil permease family protein  
 VC0993 N-acetylglucosamine repressor (nagC)  
 VC0995 PTS system, N-acetylglucosamine-specific IIABC component (nagE)  
 VCA1025 glucosamine-6-phosphate isomerase (nagB)  
 VC0994 N-acetylglucosamine-6-phosphate deacetylase (nagA-1)  
 VCA0811 chitinase  
 VC1844 cytochrome d ubiquinol oxidase, subunit I (cydA)  
 VC2000 glyceraldehyde 3-phosphate dehydrogenase (gapA-1)  
 VC2646 phosphoenolpyruvate carboxylase (ppc)  
 VC0770 conserved hypothetical protein  
 VC1828 conserved hypothetical protein  
 VC2684 aspartokinase II/homoserine dehydrogenase, methionine-sensitive (metL)  
 VC2683 cystathionine gamma-synthase (metB)
