# Supplementary material
Source: PubMed Central journal article supplement (PMC356983)
Supplement: pnas_0308707101_11.pdf [file pnas_0308707101_11.pdf]

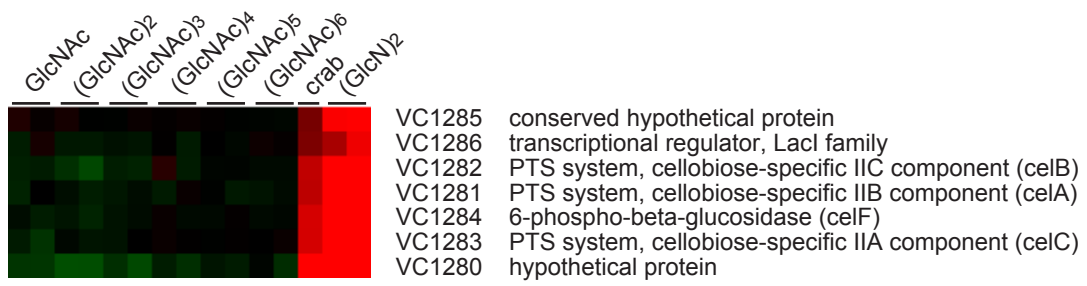

VC1285 conserved hypothetical protein  
 VC1286 transcriptional regulator, LacI family  
 VC1282 PTS system, cellobiose-specific IIC component (celB)  
 VC1281 PTS system, cellobiose-specific IIB component (celA)  
 VC1284 6-phospho-beta-glucosidase (celF)  
 VC1283 PTS system, cellobiose-specific IIA component (celC)  
 VC1280 hypothetical protein
